# Supplementary material
Source: PubMed Central journal article supplement (PMC4318696)

a) Per C $\alpha$  R.M.S.D of CDA-C1 MD simulation targeted to SrfAC conformation

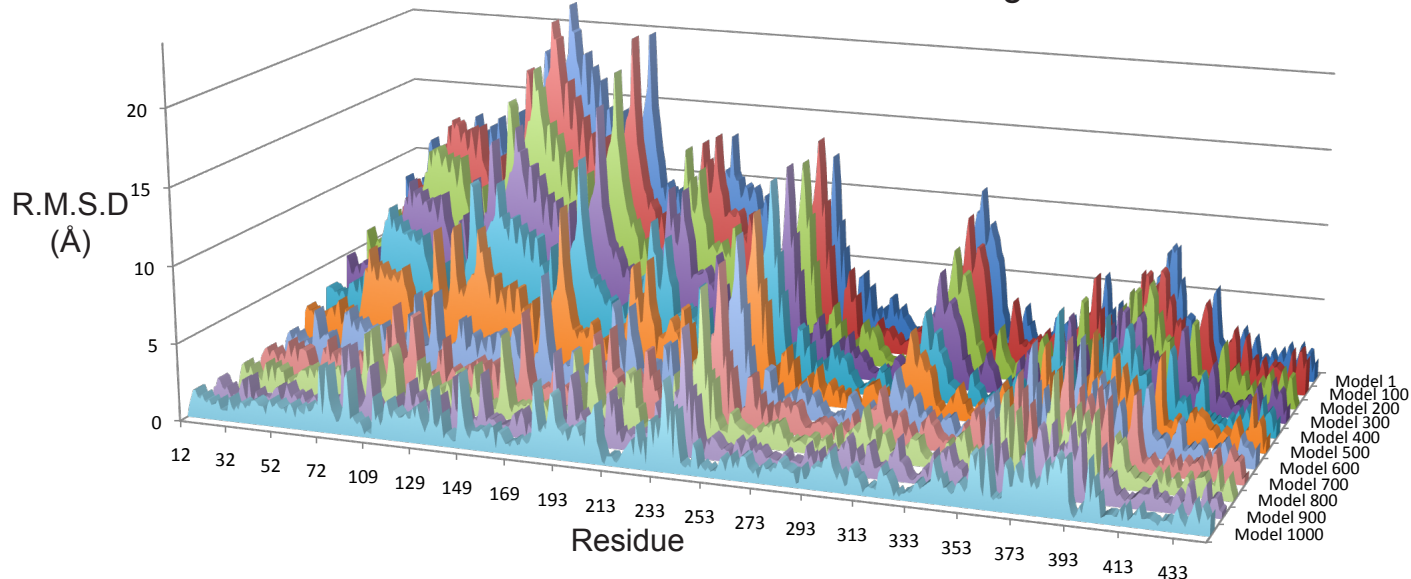

b) Per C $\alpha$  R.M.S.D. of CDA-C1 MD simulation targeted to VibHh conformation

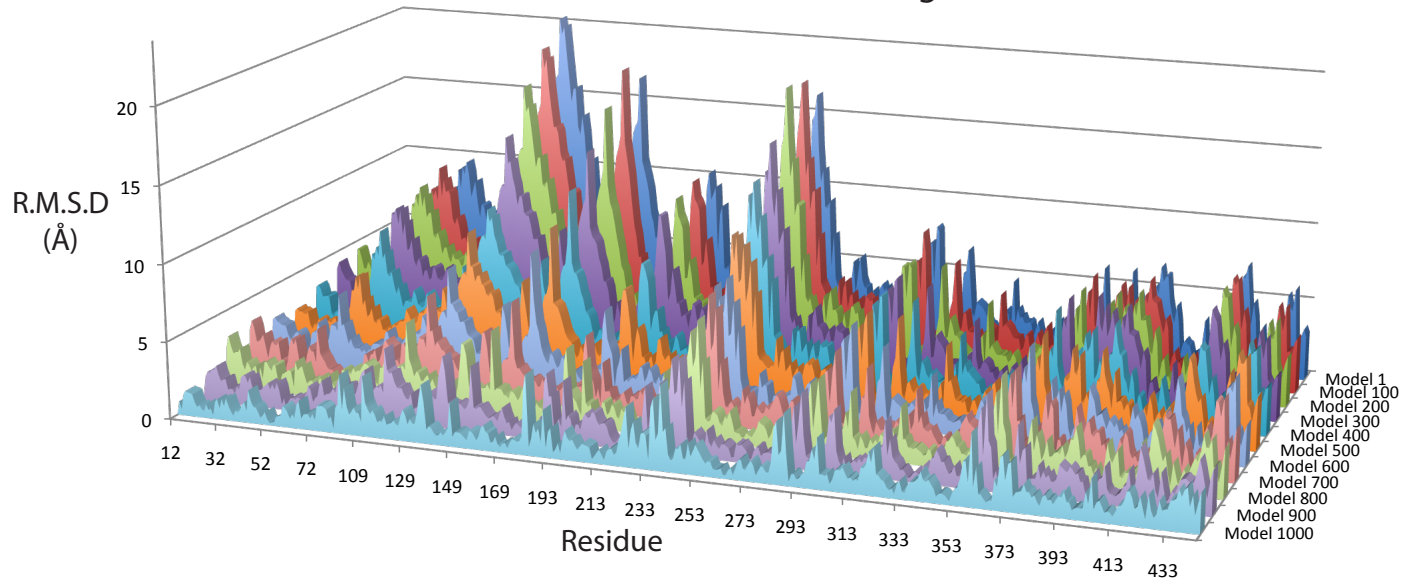

c) Per C $\alpha$  R.M.S.D. of CDA-C1 MD simulation targeted to TycC conformation

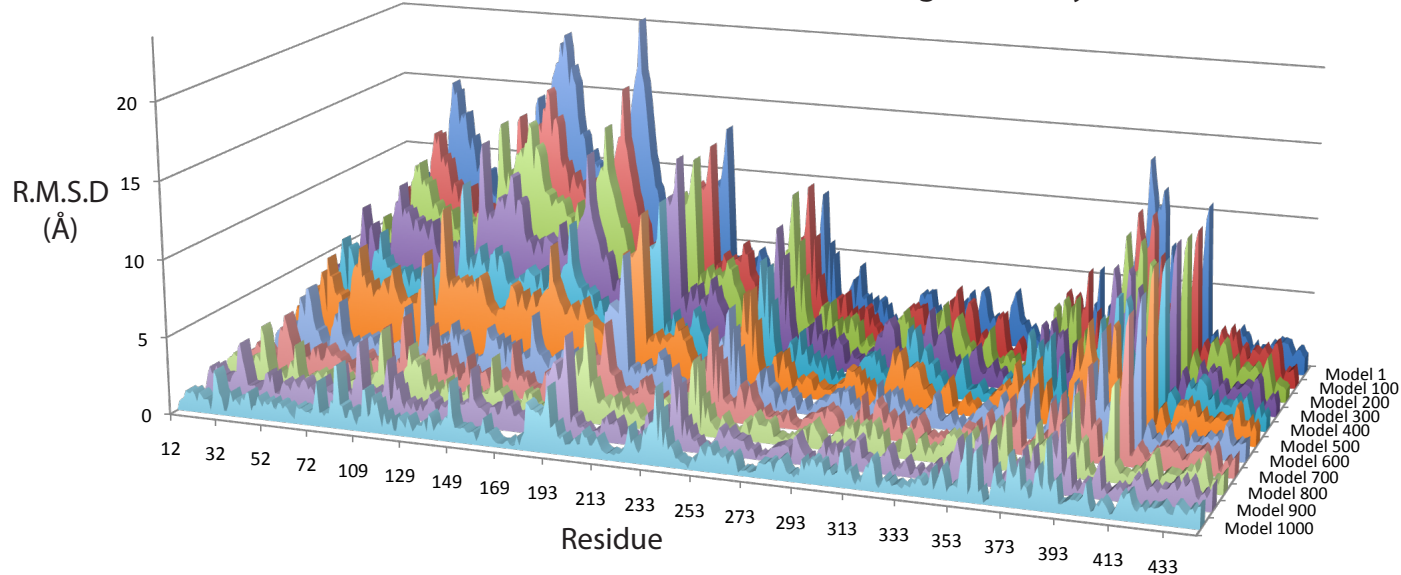

Supplement: NIHMS4143-supplement-Figure_S6.pdf [file NIHMS4143-supplement-Figure_S6.pdf]
