# Supplementary material
Source: PubMed Central journal article supplement (PMC4318696)
Supplement: NIHMS4143-supplement-Table_S1.pdf [file NIHMS4143-supplement-Table_S1.pdf]

Table S1

|                                               | Native                                        | MAD (SeMet)                                   |                                               |                                               |
|-----------------------------------------------|-----------------------------------------------|-----------------------------------------------|-----------------------------------------------|-----------------------------------------------|
|                                               |                                               | Peak                                          | Inflection                                    | Remote                                        |
| <b>Diffraction Data</b>                       |                                               |                                               |                                               |                                               |
| Wavelength (Å)                                | 1.5418                                        | 0.97860                                       | 0.9792                                        | 0.9070                                        |
| Space Group                                   | P2 <sub>1</sub>                               | P2 <sub>1</sub> 2 <sub>1</sub> 2 <sub>1</sub> | P2 <sub>1</sub> 2 <sub>1</sub> 2 <sub>1</sub> | P2 <sub>1</sub> 2 <sub>1</sub> 2 <sub>1</sub> |
| Unit-cell parameters (Å)                      | a=62.13,<br>b=82.438,<br>c=87.732;<br>β=106.3 | a=62.788,<br>b=83.477,<br>c=177.588           | a=62.786,<br>b=83.492,<br>c=177.594           | a=62.786,<br>b=83.508,<br>c=177.615           |
| Resolution (Å)                                | 50.00-2.44<br>(2.47-2.44)                     | 50.00-1.80<br>(1.83-1.80)                     | 50.00-1.80<br>(1.83-1.80)                     | 50.00-1.80<br>(1.83-1.80)                     |
| <I/σ(I)>                                      | 13.9 (2.6)                                    | 14.8 (2.5)                                    | 17.8 (2.4)                                    | 16.7 (2.0)                                    |
| Temperature (K)                               | 100                                           | 100                                           | 100                                           | 100                                           |
| Measured Reflections ( <i>n</i> )             | 119278                                        | 528361                                        | 550502                                        | 517345                                        |
| Unique Reflections ( <i>n</i> )               | 31620                                         | 87173                                         | 87248                                         | 87717                                         |
| Completeness (%)                              | 98.5 (82.1)                                   | 99.9 (99.8)                                   | 100.0 (100.0)                                 | 100.0<br>(99.9)                               |
| Multiplicity                                  | 3.8 (3.5)                                     | 6.1 (5.5)                                     | 6.3 (5.9)                                     | 5.9 (5.5)                                     |
| R <sub>merge</sub> <sup>a</sup> (%)           | 10.1 (49.1)                                   | 10.7 (70.2)                                   | 10.3 (75.7)                                   | 10.7 (81.2)                                   |
| Sites ( <i>n</i> )                            | -                                             | 8                                             | 8                                             | 8                                             |
| <b>Refinement Statistics</b>                  |                                               |                                               |                                               |                                               |
| Resolution range (Å)                          | 33.91-2.44                                    |                                               | 34.11-1.69                                    |                                               |
| R-factor/R <sub>free</sub> (%) <sup>b,c</sup> | 20.0/25.7                                     |                                               | 19.4/21.5                                     |                                               |
| Average B-Factor (Å <sup>2</sup> )            | 33.20                                         |                                               | 25.10                                         |                                               |
| R.M.S.D in bond lengths (Å)                   | 0.0016                                        |                                               | 0.0036                                        |                                               |
| R.M.S.D in bond lengths (°)                   | 0.497                                         |                                               | 0.821                                         |                                               |
| <b>Ramachandran Plot (%)</b>                  |                                               |                                               |                                               |                                               |
| Favoured                                      | 97.5                                          |                                               | 98.7                                          |                                               |
| Allowed                                       | 2.1                                           |                                               | 1.1                                           |                                               |
| Outliers                                      | 0.4                                           |                                               | 0.2                                           |                                               |

<sup>a</sup>  $R_{merge} = \frac{\sum_{hkl} \sum_i |I_i(hkl) - \langle I(hkl) \rangle|}{\sum_{hkl} \sum_i I_i(hkl)}$ , where  $I_i(hkl)$  is the *i*th measurement and  $\langle I(hkl) \rangle$  is the weighted average of all measured reflections.

<sup>b</sup>  $R - factor = \frac{\sum ||F_{obs}(hkl)| - |F_{calc}(hkl)||}{\sum |F_{obs}(hkl)|}$

<sup>c</sup> R<sub>free</sub> is the R-factor computed for the test set of reflections omitted from the refinement process.
