# Supplementary material
Source: PubMed Central journal article supplement (PMC4318696)
Supplement: NIHMS4143-supplement-Table_S2.pdf [file NIHMS4143-supplement-Table_S2.pdf]

Table S2

| <b>Protein</b>                    | <b>Theoretical Mass<br/>(Da)</b> | <b>Observed Mass<br/>(Da)</b> |
|-----------------------------------|----------------------------------|-------------------------------|
| Apo-ACP                           | 8471.4                           | 8471.0                        |
| Hexanoyl-ACP                      | 8909.9                           | 8909.1                        |
| 2,3-epoxyhexanoyl-ACP             | 8923.9                           | 8924.1                        |
| Holo-ACP                          | 8830.8                           | 8809.1                        |
| Apo-DptA-PCP1                     | 12077.7                          | 12077.3                       |
| Holo-DptA-PCP1                    | 12419.0                          | 12417.4                       |
| Seryl-DptA-PCP1                   | 12506.1                          | 12505.3                       |
| 2,3-epoxyhexanoyl-Seryl-DptA-PCP1 | 12618.3                          | 12615.4                       |
