# Supplementary material
Source: PubMed Central journal article supplement (PMC4318696)

Figure S2

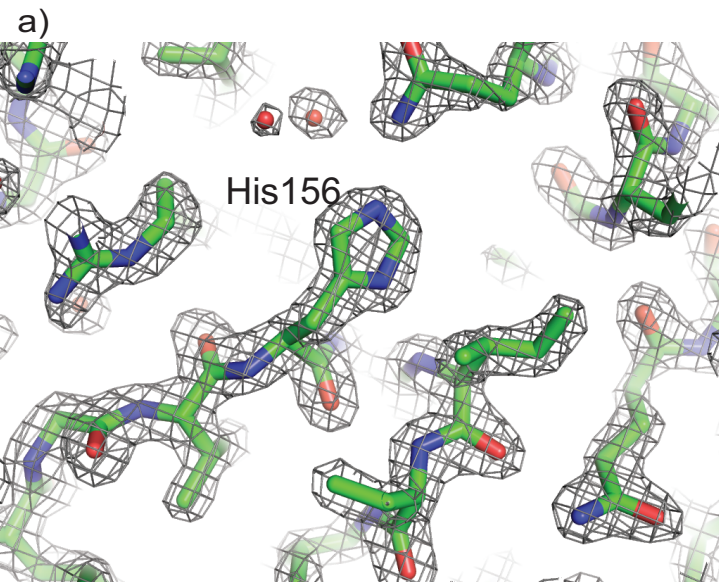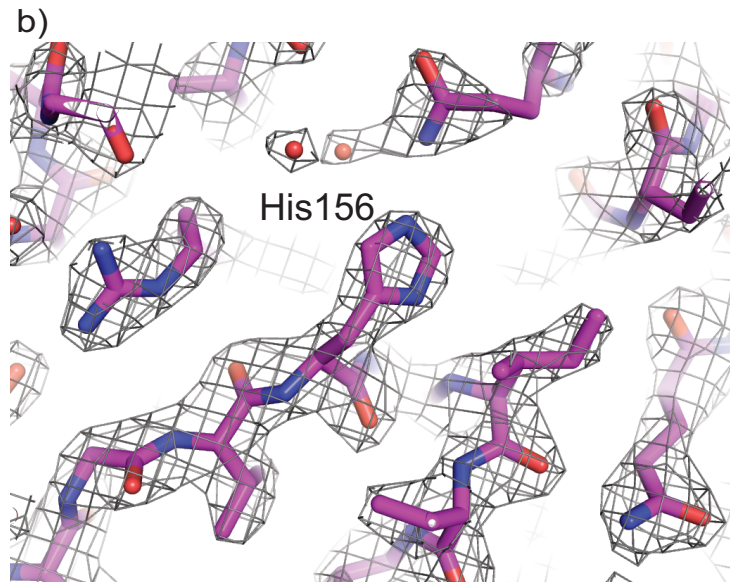

Supplement: NIHMS4143-supplement-Figure_S2.pdf [file NIHMS4143-supplement-Figure_S2.pdf]

Figure S3

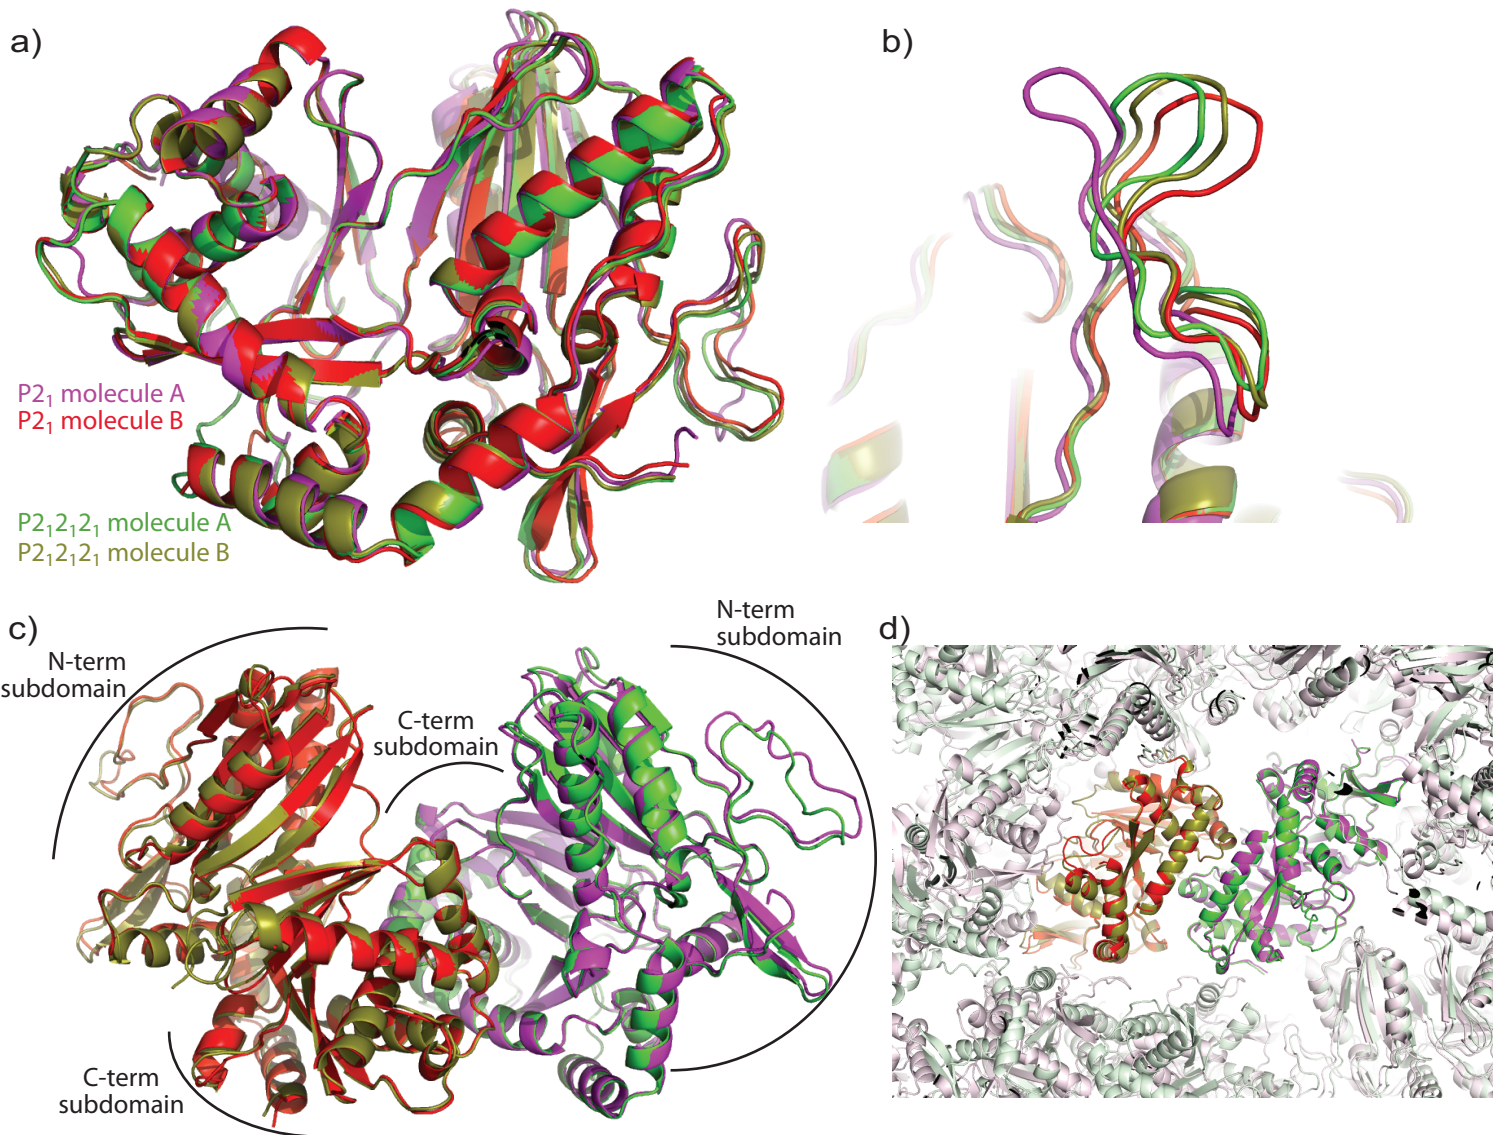

Supplement: NIHMS4143-supplement-Figure_S3.pdf [file NIHMS4143-supplement-Figure_S3.pdf]

Figure S4

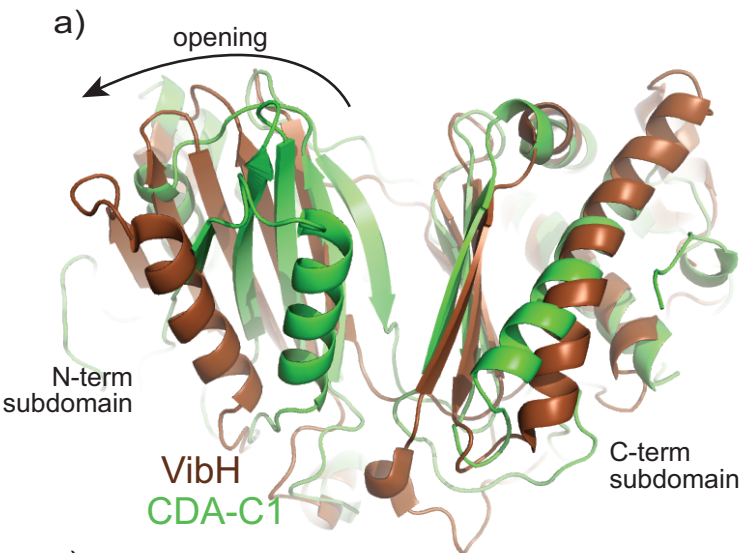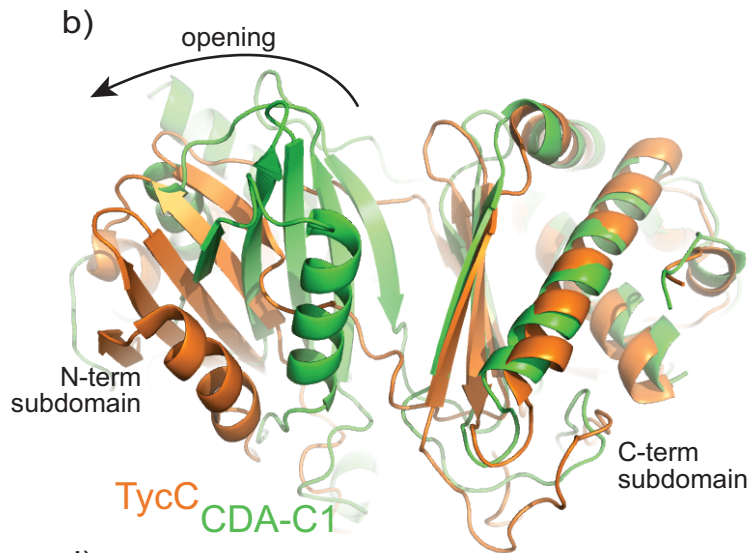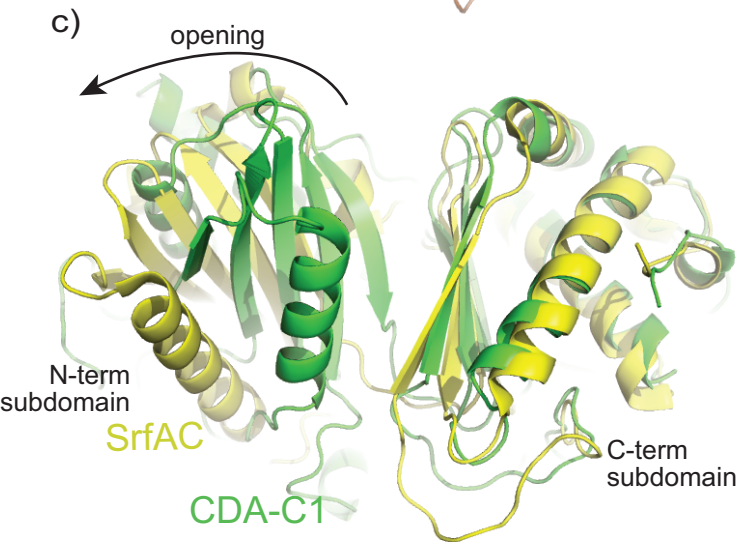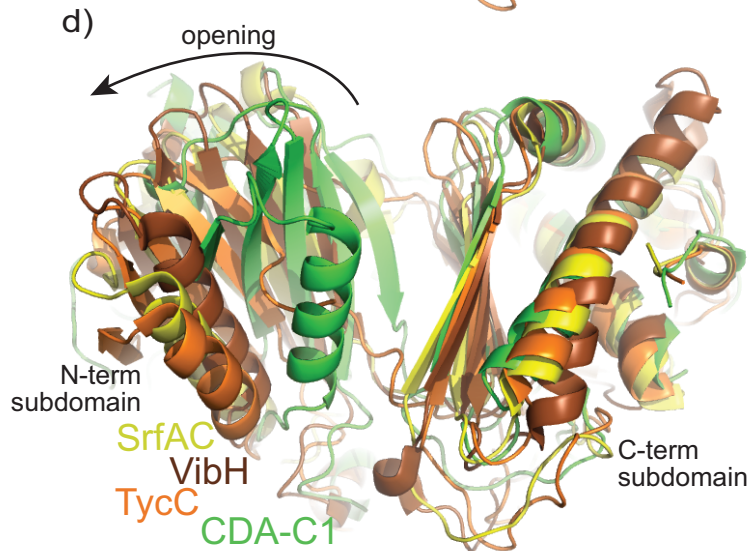

Supplement: NIHMS4143-supplement-Figure_S4.pdf [file NIHMS4143-supplement-Figure_S4.pdf]

Figure S5

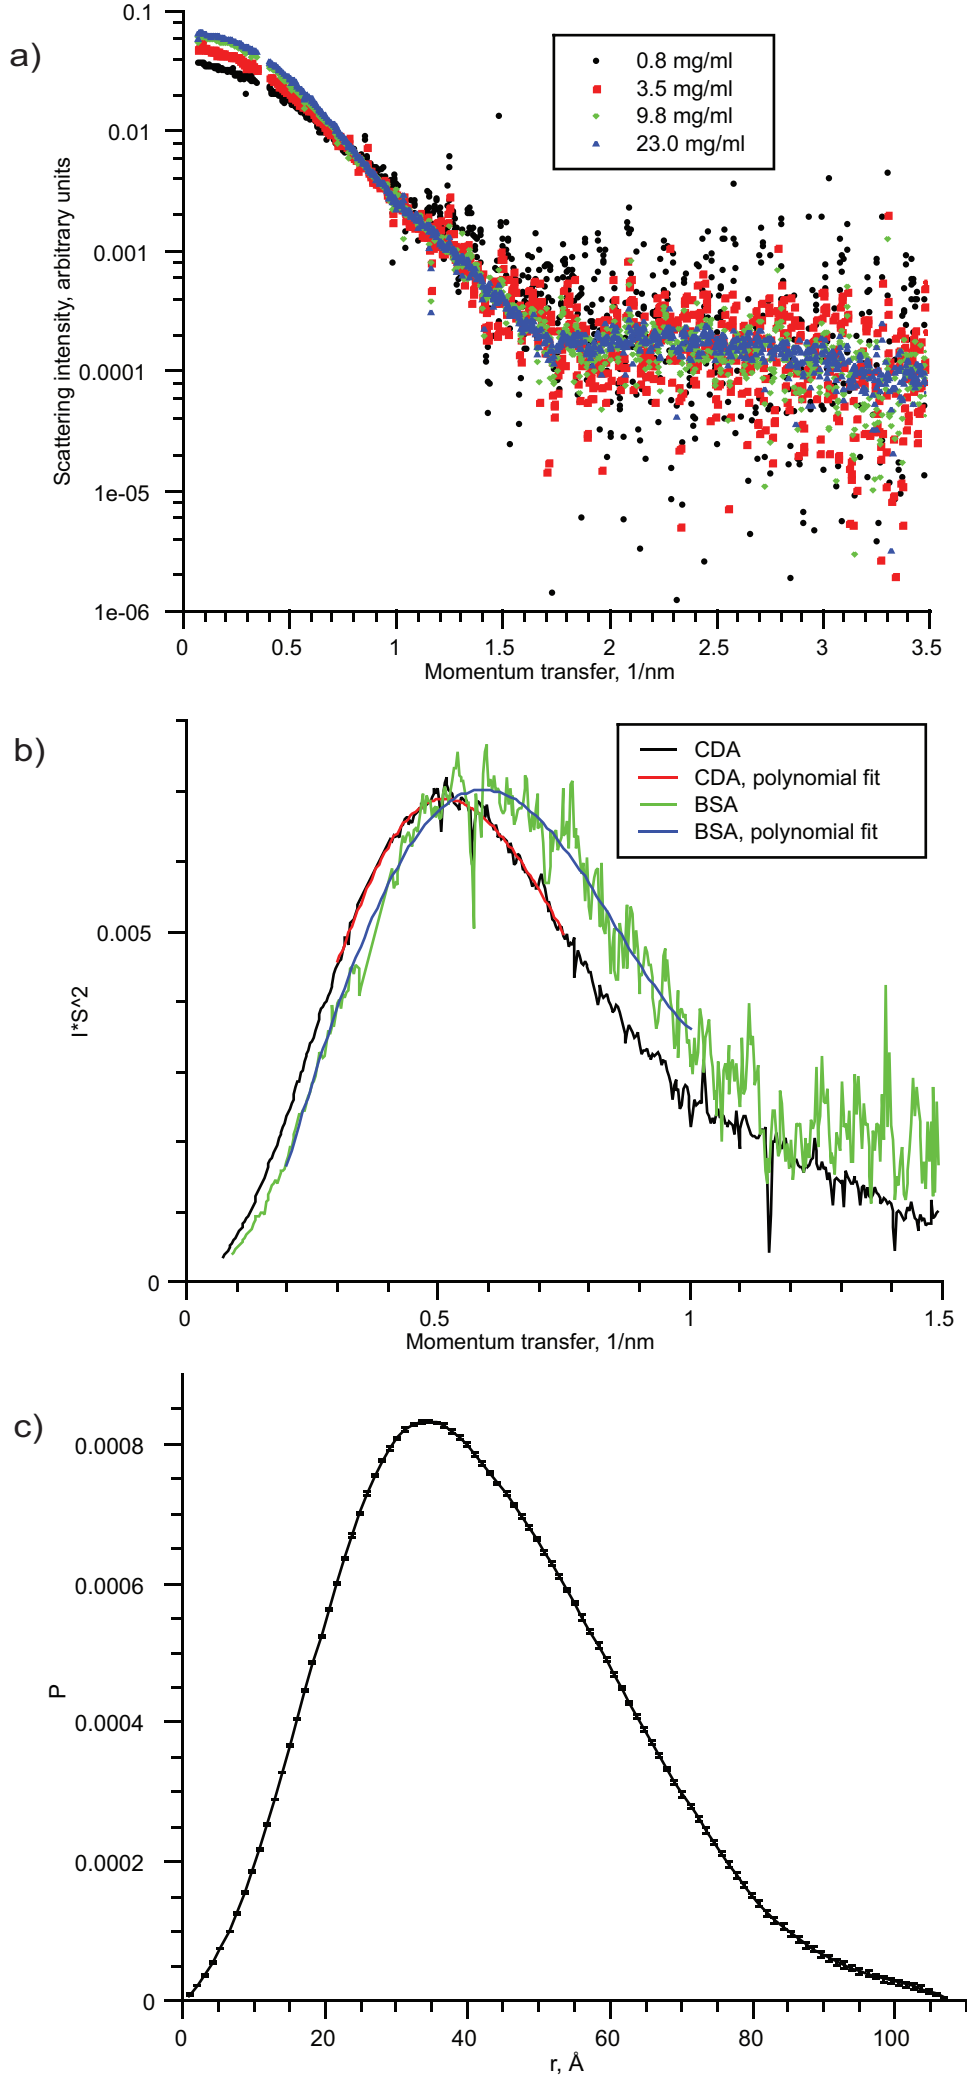

Supplement: NIHMS4143-supplement-Figure_S5.pdf [file NIHMS4143-supplement-Figure_S5.pdf]

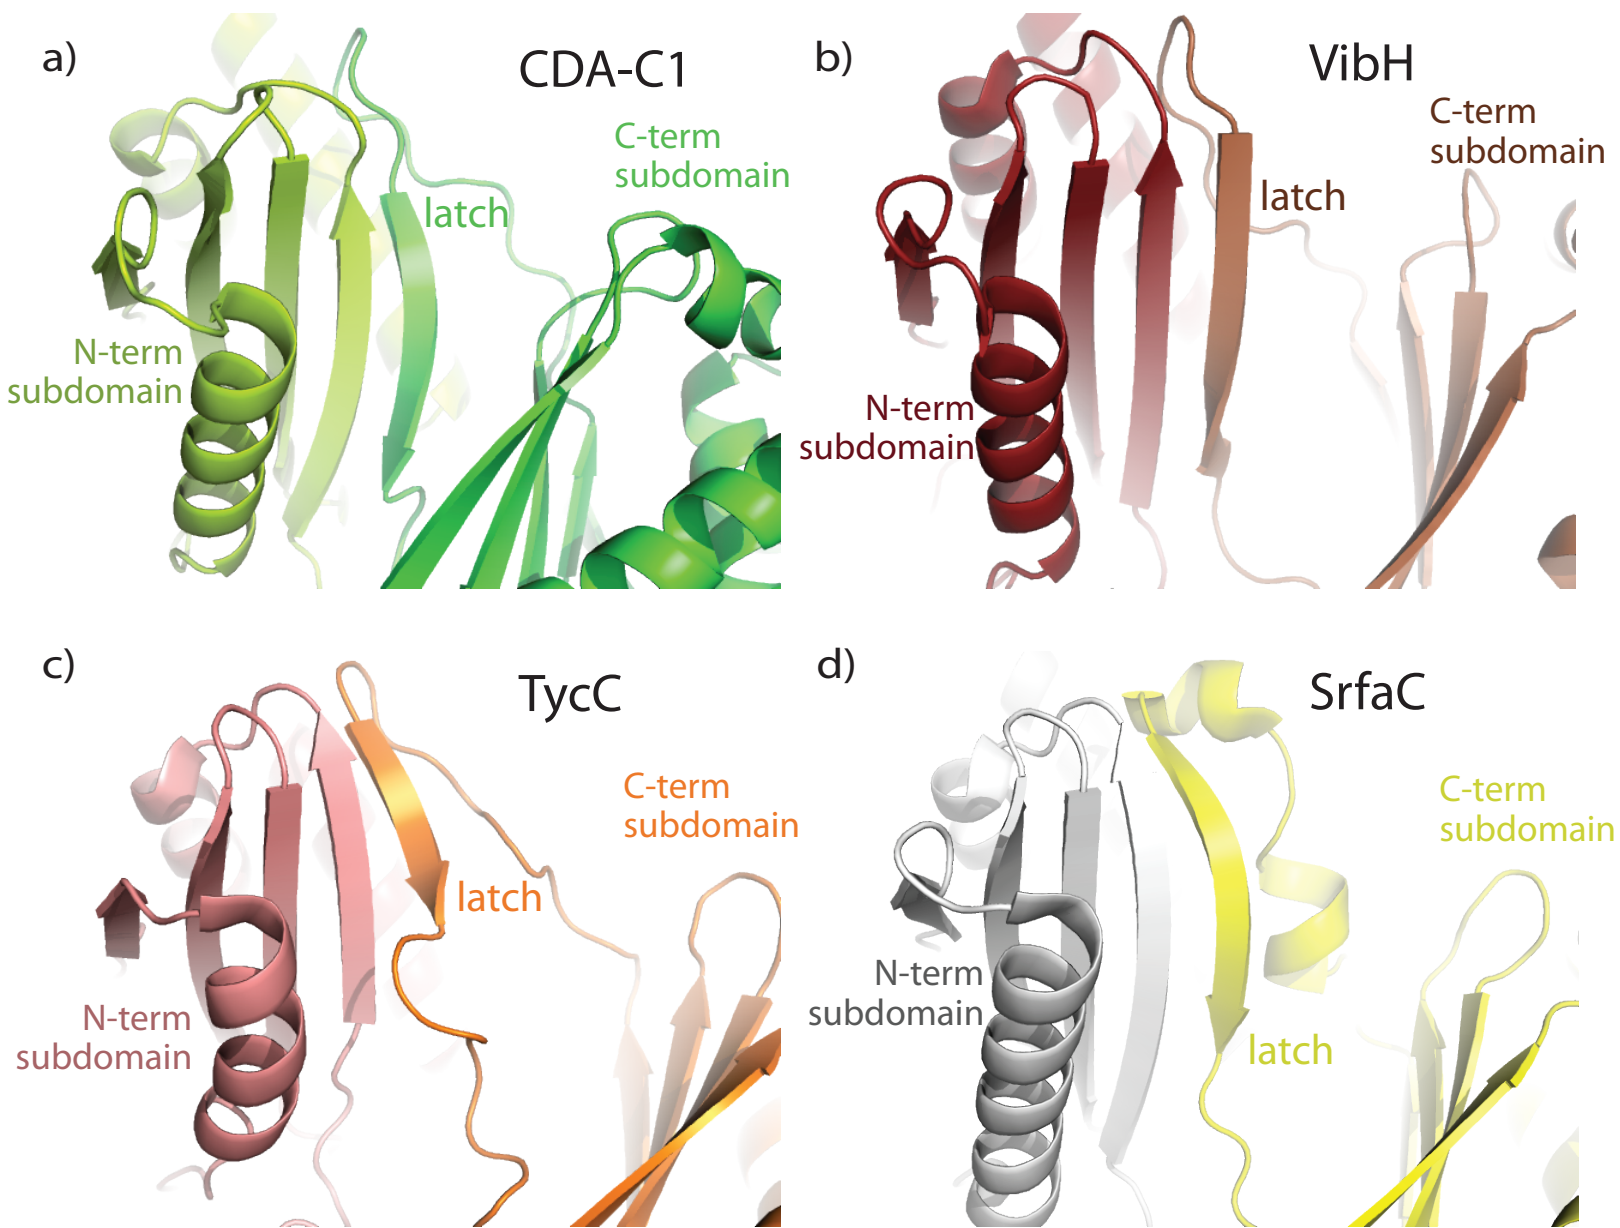

Supplementary Figure S7

Supplement: NIHMS4143-supplement-Figure_S7.pdf [file NIHMS4143-supplement-Figure_S7.pdf]
